# Supplementary material for: Impact of increased resolution on the representation of the Canary upwelling system in climate models
Source: Copernicus journal article supplement (doi:10.5194/gmd-2022-130), 2022-05-17

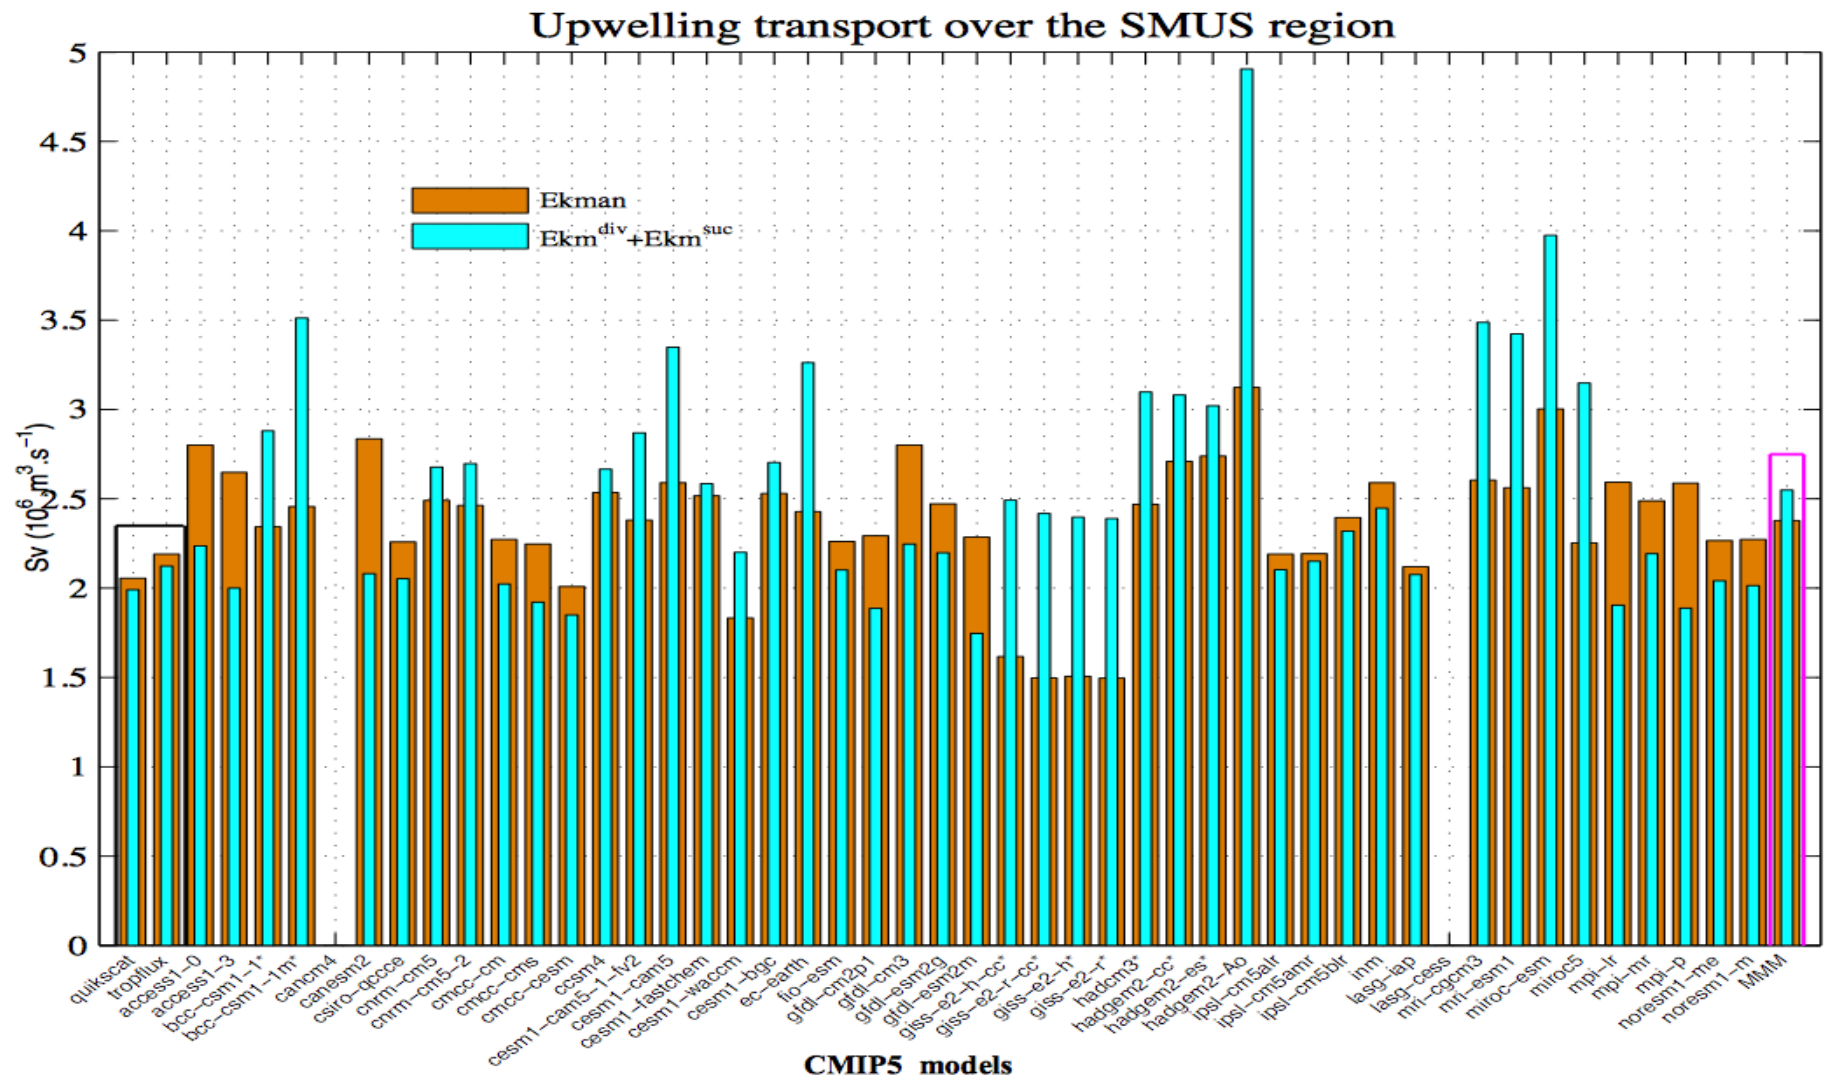

Figure 1: Estimation of upwelling transport (sverdrup) averaged from November to May over 1985-2005 period computed by the integration of Ekman transport along the boundaries of SMUS region (orange, 12°N-20°N and 16°W-20°W) and estimation computed with the sum of Ekman divergence and Ekman suction (cyan). The left (right) column in black (magenta) correspond to the validation data (Multi-model mean: MMM).

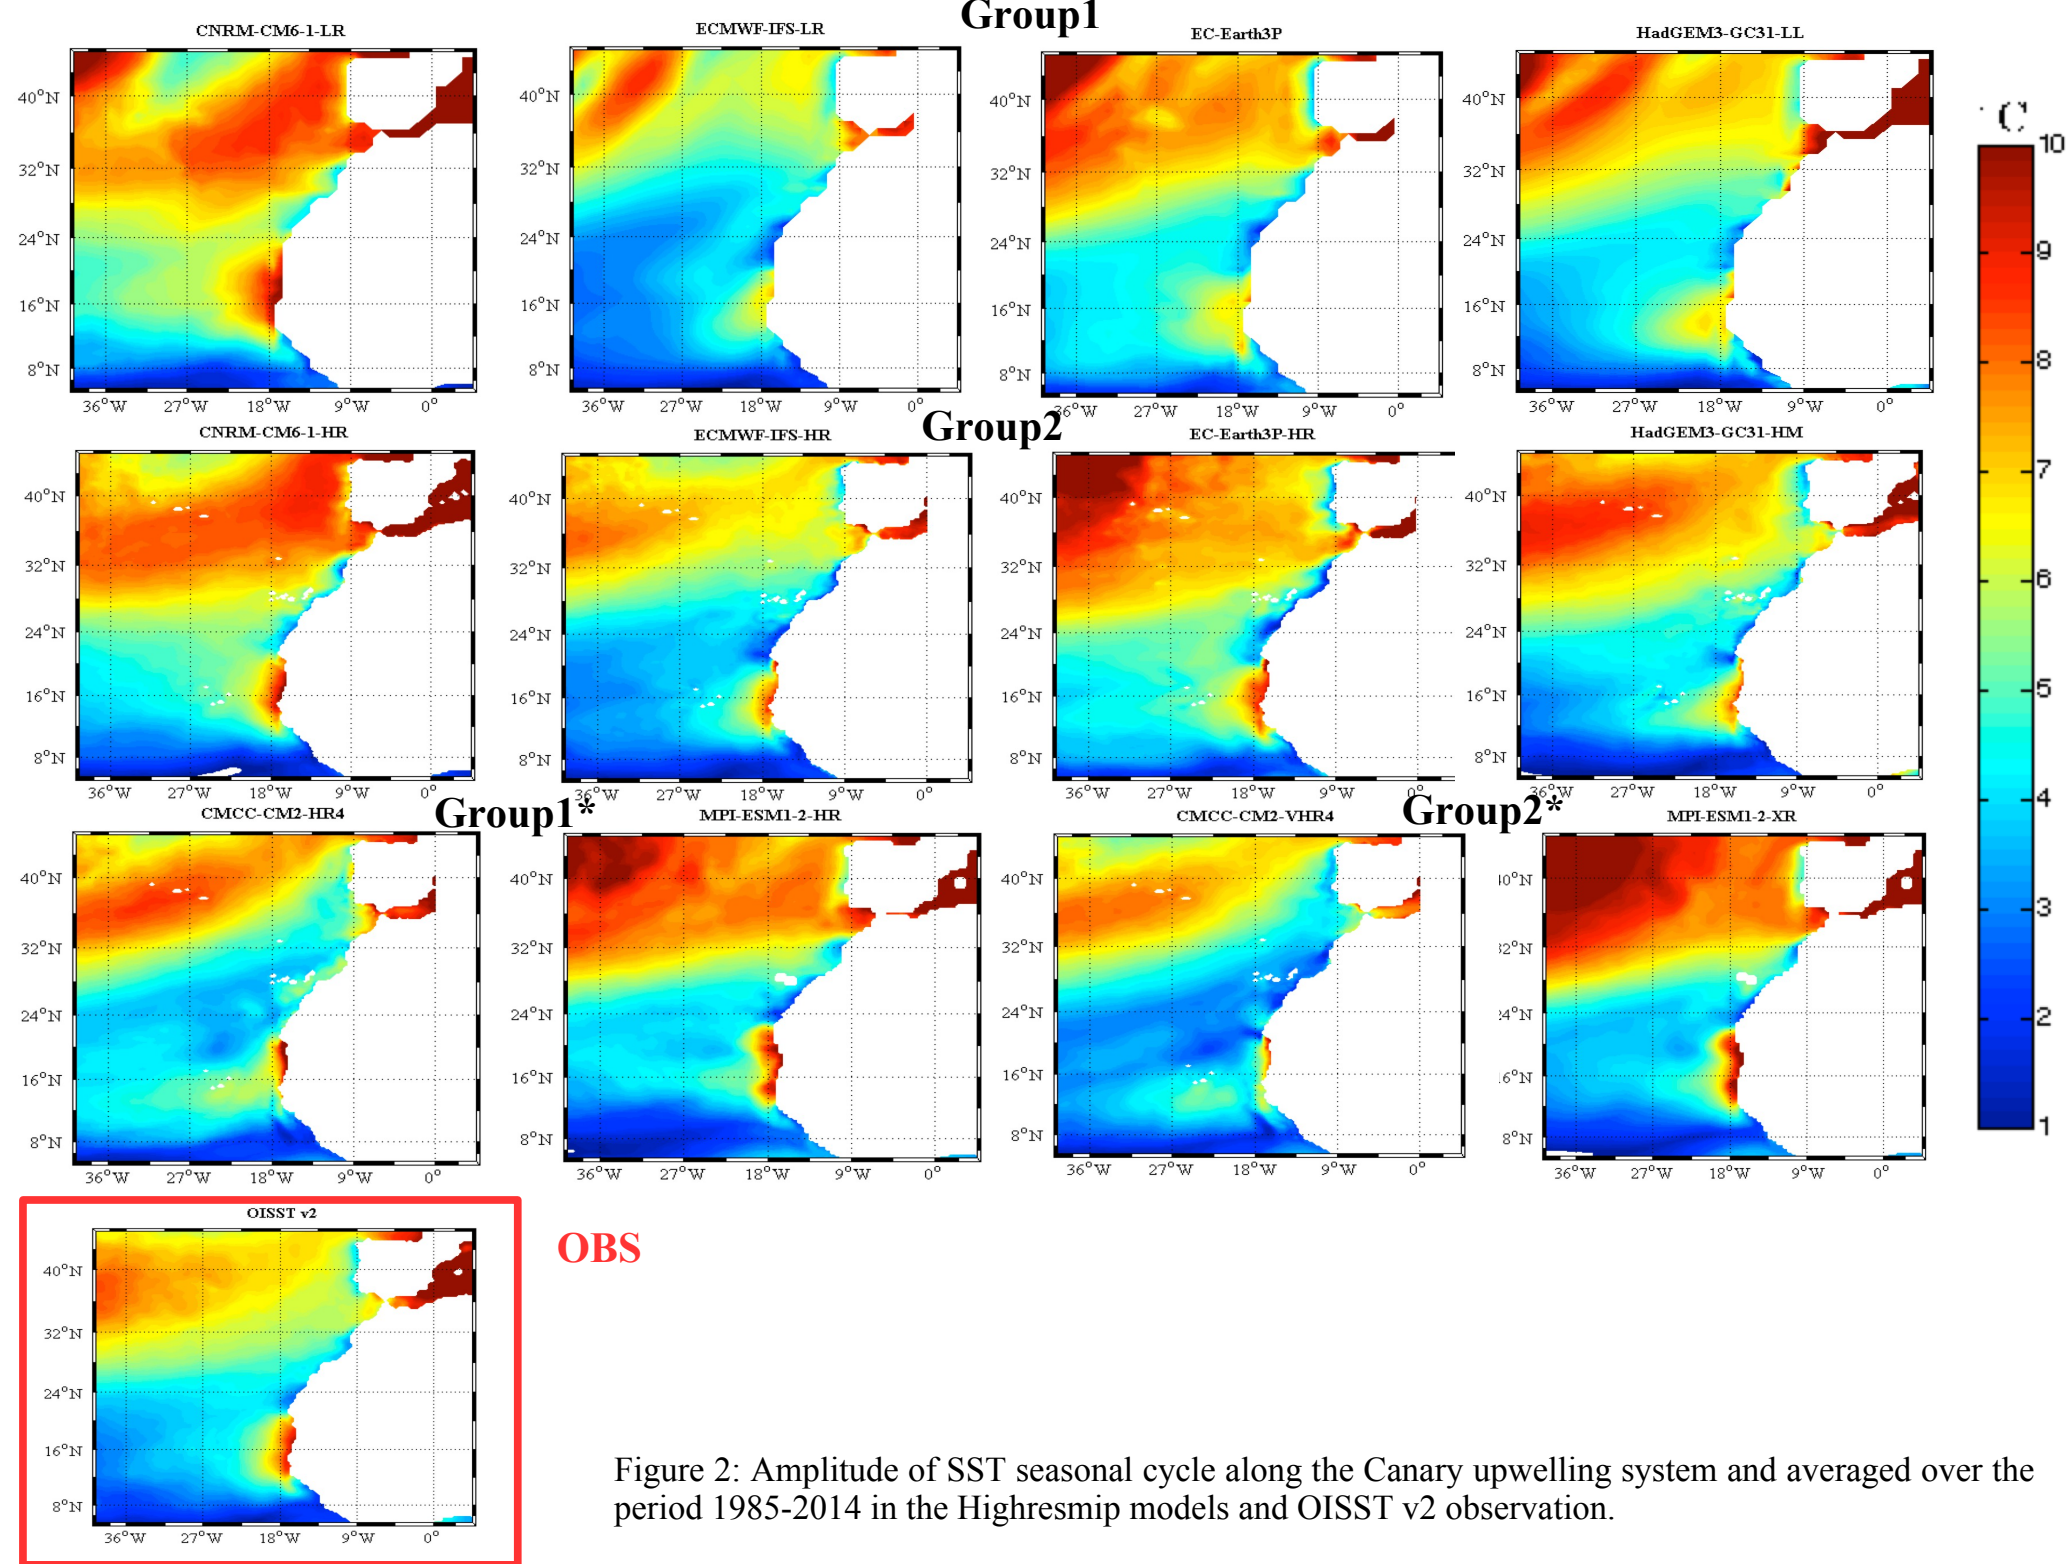

Supplement: Supplementary file [file gmd-2022-130-AC2-supplement.pdf]
